# Supplementary material for: Microbiota of the indoor environment: a meta-analysis
Source: PubMed Central journal article supplement (PMC4604073; doi:10.1186/s40168-015-0108-3), 2015-10-13
Supplement: 40168_2015_108_MOESM1_ESM.pdf [file 40168_2015_108_MOESM1_ESM.pdf]

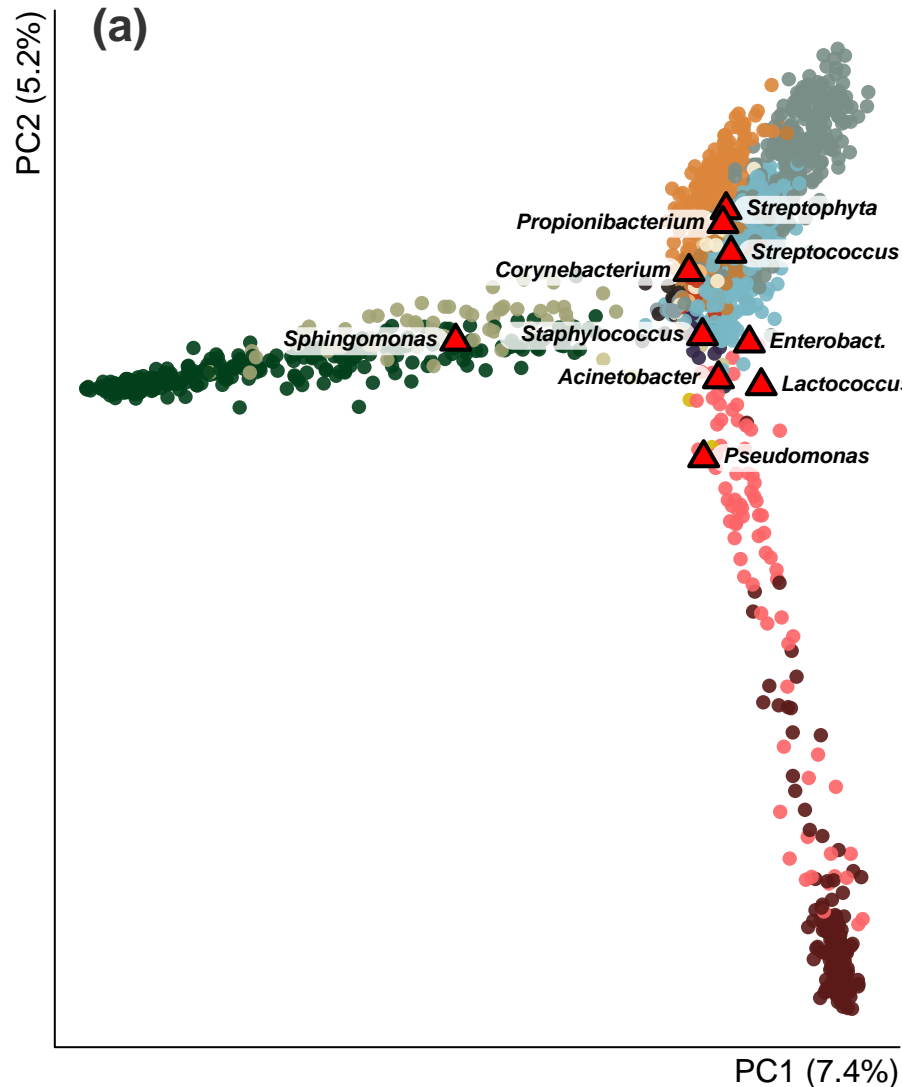

- Austria ICU
- California NICU (SD)
- California office
- Colorado restroom surfaces
- France building air
- Oregon classroom surfaces
- North Carolina homes
- Oregon classroom air
- France museum air
- Oregon university dust
- Colorado kitchen surfaces
- California dairy
- South Korea homes
- Connecticut classroom air
- California NICU (Sac)
- California residence air (Berk)
