# Supplementary material for: Microbiota of the indoor environment: a meta-analysis
Source: PubMed Central journal article supplement (PMC4604073; doi:10.1186/s40168-015-0108-3), 2015-10-13

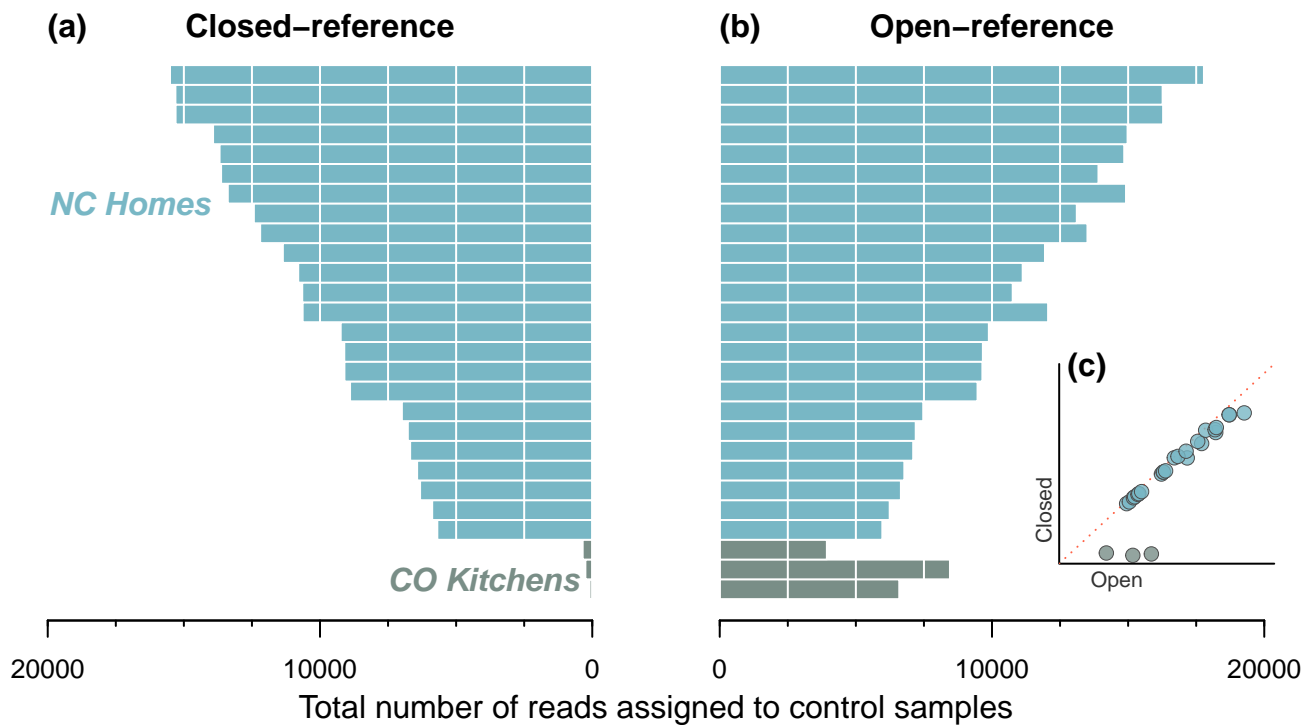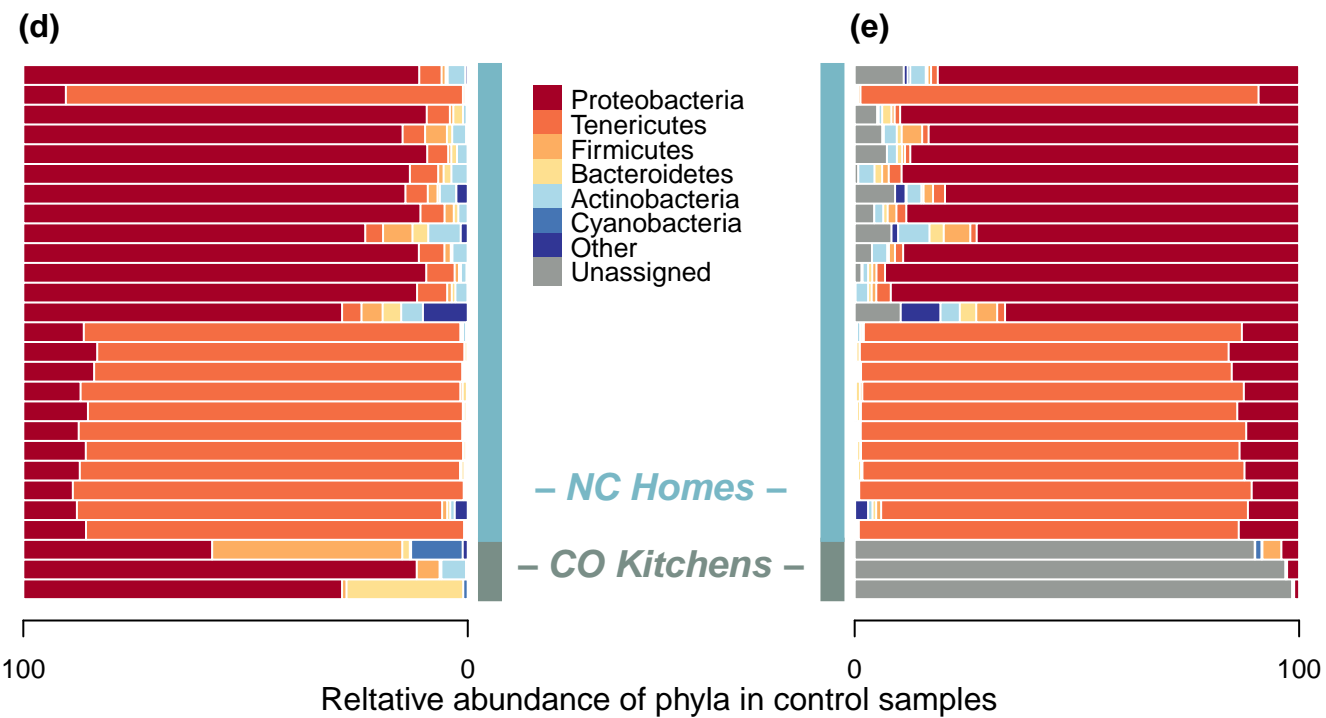

Supplement: 40168_2015_108_MOESM4_ESM.pdf [file 40168_2015_108_MOESM4_ESM.pdf]
